# Supplementary material for: Outer membrane permeability: Antimicrobials and diverse nutrients bypass porins in Pseudomonas aeruginosa
Source: PubMed Central journal article supplement — Proc Natl Acad Sci U S A. 2021 Jul 29;118(31):e2107644118. doi: 10.1073/pnas.2107644118 (PMC8346889; doi:10.1073/pnas.2107644118), 2021-07-29
Supplement: pnas.2107644118.sapp.pdf [file pnas.2107644118.sapp.pdf]

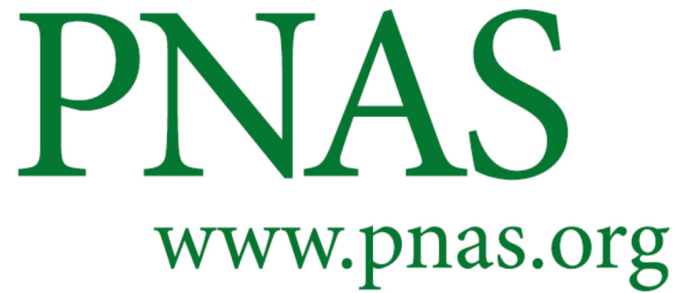

### **Supplementary Information for**

Outer membrane permeability: antimicrobials and diverse nutrients bypass porins in *Pseudomonas aeruginosa*

Johanna Ude<sup>1,4</sup>, Vishwachi Tripathi<sup>1,4</sup>, Julien M. Buyck<sup>1,4</sup>, Sandra Söderholm<sup>1</sup>, Olivier Cunrath<sup>1</sup>, Joseph Fanous<sup>1</sup>, Beatrice Claudi<sup>1</sup>, Adrian Egli<sup>2,3</sup>, Christian Schleberger<sup>1</sup>, Sebastian Hiller<sup>1,\*</sup>, Dirk Bumann<sup>1,\*</sup>

<sup>1</sup>Biozentrum, <sup>2</sup>University Hospital, <sup>3</sup>Department Biomedicine, University of Basel, CH-4056 Switzerland; <sup>4</sup>these authors contributed equally.

\*Corresponding authors: Sebastian Hiller, Dirk Bumann

Email: [sebastian.hiller@unibas.ch](mailto:sebastian.hiller@unibas.ch), [dirk.bumann@unibas.ch](mailto:dirk.bumann@unibas.ch)

#### **This PDF file includes:**

Supplementary text  
Figures S1 to S3  
Tables S1 to S4  
SI Reference

## Supplementary Information Text

**Secondary mutations in strain PA14  $\Delta$ 40.** Whole-genome sequencing of parental PA14 and PA14  $\Delta$ 40 confirmed accurate deletion of 40 porin genes and identified nine secondary mutations in PA14  $\Delta$ 40 (SI, Supplementary Table S2).

Specifically, we identified:

- i) loss of a duplicate tRNA-asp gene (PA14\_24120, identical copy of the adjacent PA14\_24130);
- ii) two non-synonymous mutations: PA14\_02870 D16N (affecting a non-conserved residue in the HTH domain of a probable transcriptional regulator), PA14\_72090 R26H (affecting a residue outside of recognizable domains in a hypothetical protein),
- iii) two synonymous mutations in codon 538 of PA14\_28710 (encoding the  $\beta$  subunit of phenylalanyl-tRNA synthetase) and in codon 1,172 PA14\_33610 (encoding pyochelin synthetase PchF);
- iv) four intergenic mutations upstream of PA14\_16990 (encoding a hypothetical protein), PA14\_55640 (encoding exonuclease SbcD), and PA14\_66490 (encoding the transcriptional regulator DhcR).

None of the associated genes show a link to altered antimicrobial susceptibility in comprehensive transposon library screens, with the exception of PA14\_33610 *pchF*. Transposon inactivation of *pchF* results in two-fold higher MIC (the smallest detectable change) for ciprofloxacin (1), but the impact of the synonymous mutation in codon 1,172 of *pchF* in PA14  $\Delta$ 40 is likely small compared to full gene inactivation. LpxC and other genes that might affect barrier function were not mutated.

Together, these data suggest no major impact of the secondary mutations in PA14  $\Delta$ 40 on phenotypes relevant for this study. This was consistent with the unaltered susceptibility PA14  $\Delta$ 40 to a large diversity of antimicrobials.

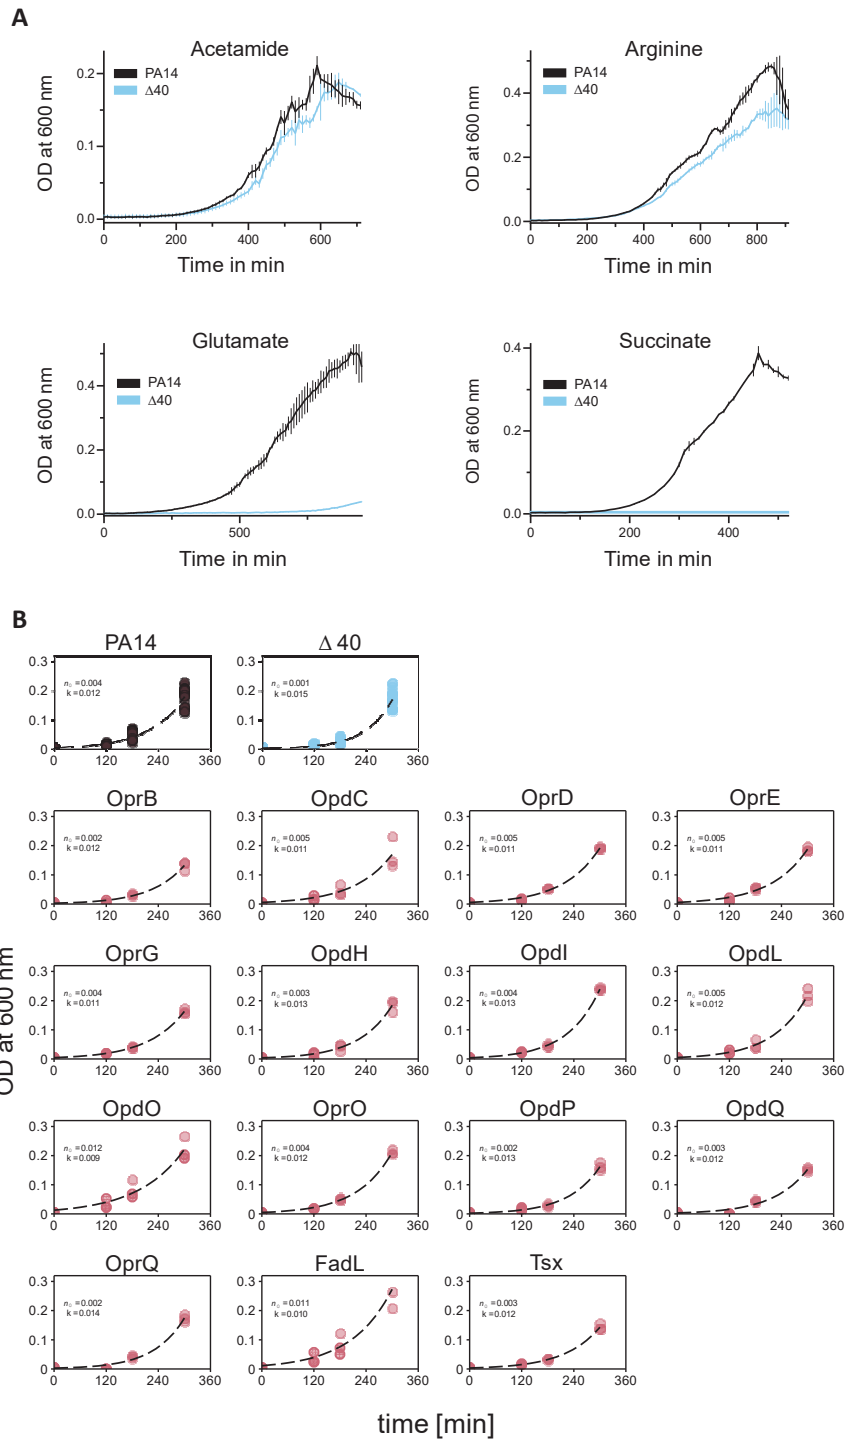

**Fig. S1.** Growth of porin-free PA14  $\Delta 40$  on single carbon/energy sources (A) and growth of PA14, PA14  $\Delta 40$ , and 15 single-porin strains on medium containing 16 different carbon/energy sources (B).

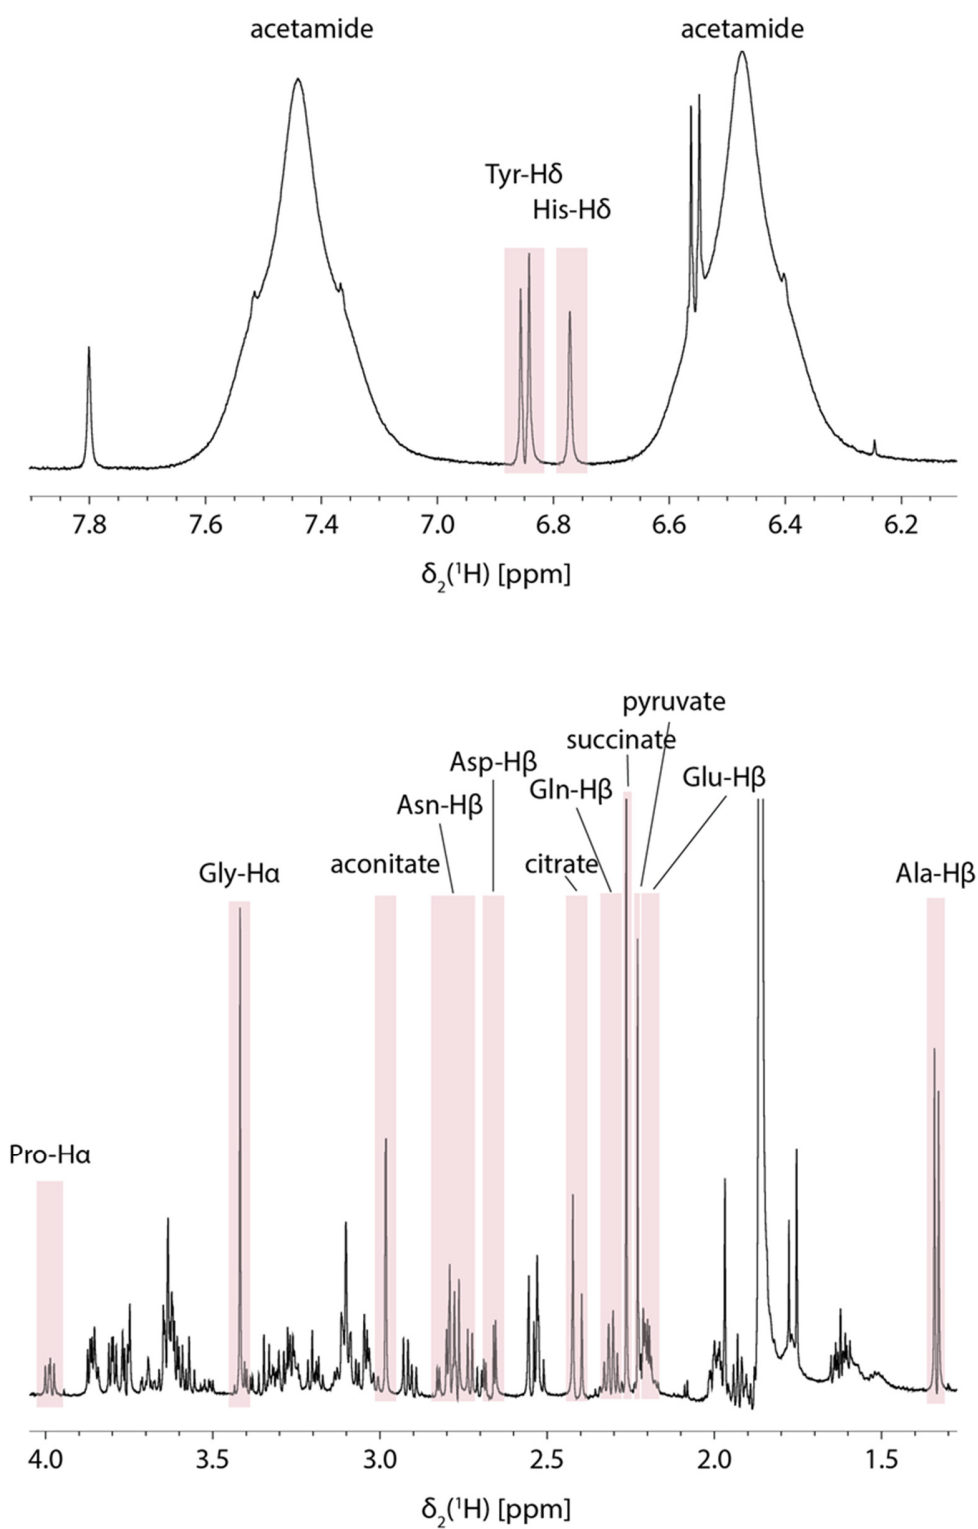

**Fig. S2.** 1D  $^1\text{H-NMR}$  spectrum of BM2 medium supplemented with nutrients of interest. Peaks used for substrate quantification are highlighted with red boxes. The acetamide peaks at 7.45 and 6.45 ppm are broadened due to chemical exchange with water.

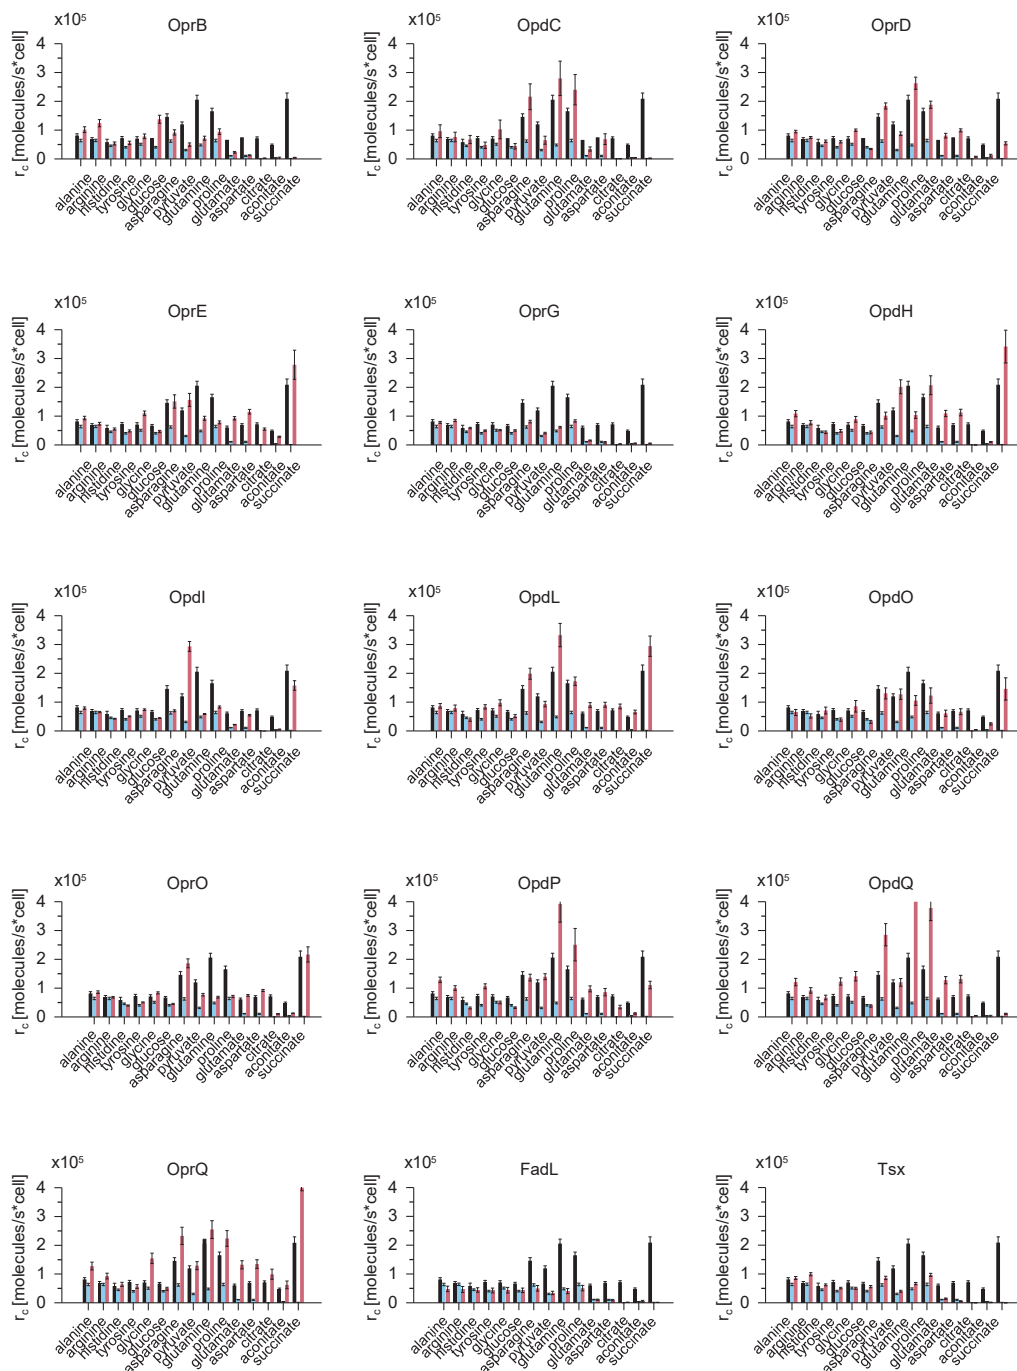

**Fig. S3.** Consumption rates of 15 single-porin strains for 16 nutrients individual porins (red) compared to PA14 (black) and PA14  $\Delta 40$  (blue). Means and standard deviations for three independent cultures are shown.

**Table S1. Candidate outer-membrane porins encoded by UCPBPP-PA14.**

| PA14 locus | PAO1 locus  | Gene name           | Postulated substrates                                                                                                                  | PubMedIDs                                                    | Comments                                                                         |
|------------|-------------|---------------------|----------------------------------------------------------------------------------------------------------------------------------------|--------------------------------------------------------------|----------------------------------------------------------------------------------|
| PA14_01770 | no ortholog |                     |                                                                                                                                        | 26578582                                                     | similar to <i>tsx</i>                                                            |
| PA14_02020 | PA0162      | <i>opdC, occD2</i>  | arginine, histidine                                                                                                                    | 16352820,<br>26578582                                        |                                                                                  |
| PA14_02060 | PA0165      | <i>tsx</i>          | nucleosides                                                                                                                            | 26578582                                                     | based on similarity to <i>E. coli tsx</i>                                        |
| PA14_02370 | PA0189      | <i>opdI, occD5</i>  | arginine                                                                                                                               | 26578582                                                     |                                                                                  |
| PA14_02890 | PA0234      |                     |                                                                                                                                        | 26578582                                                     | similar to <i>tsx</i>                                                            |
| PA14_02980 | PA0240      | <i>opdF, occK2</i>  | benzoate, <b>carbenicillin</b> , <b>cefoxitin</b> , <b>gentamicin</b> , glucuronate, 4-nitrobenzoate, pyroglutamate, <b>temocillin</b> | 16352820,<br>22272184,<br>26578582                           |                                                                                  |
| PA14_03800 | PA0291      | <i>oprE, occK8</i>  | arabinose, ribose, glucose, galactose, mannose, N-acetylglucosamine                                                                    | 2539376                                                      |                                                                                  |
| PA14_09850 | PA4179      | <i>opdN, occK10</i> | 5-aminolevulinate, glutamate                                                                                                           | 16352820,<br>17470813                                        |                                                                                  |
| PA14_10440 | PA4137      | <i>opdL, occK4</i>  | benzoate, glucuronate, phenylacetate, pyroglutamate                                                                                    | 16352820,<br>17470813,<br>22272184                           |                                                                                  |
| PA14_10870 | PA4099      | <i>oprB3</i>        |                                                                                                                                        | 26578582                                                     | similar to <i>oprB</i>                                                           |
| PA14_11270 | PA4067      | <i>oprG</i>         | alanine, glycine, hydrophobic molecules, iron (II), phthalate, serine, valine                                                          | 16352820,<br>17470813,<br>21124774,<br>26655471,<br>26578582 |                                                                                  |
| PA14_15280 | PA3772      | <i>qbdB</i>         |                                                                                                                                        |                                                              | similar to <i>sphA</i>                                                           |
| PA14_16630 | PA3692      | <i>lptF</i>         |                                                                                                                                        |                                                              | no outer membrane beta-barrel protein but OmpA-like peptidoglycan-binding domain |
| PA14_17890 | PA3588      | <i>opdR, occK11</i> | phenylacetate                                                                                                                          | 16352820,<br>17470813                                        |                                                                                  |
| PA14_18510 | PA3544      | <i>algE</i>         | alginate (secretion)                                                                                                                   | 23335756                                                     |                                                                                  |
| PA14_21610 | PA3280      | <i>oprO</i>         | pyrophosphate                                                                                                                          | 1370289,<br>26578582                                         |                                                                                  |
| PA14_21620 | PA3279      | <i>oprP</i>         | phosphate                                                                                                                              | 1370289,<br>26578582                                         |                                                                                  |

|            |             |                    |                                                                                                           |                                                              |                                                             |
|------------|-------------|--------------------|-----------------------------------------------------------------------------------------------------------|--------------------------------------------------------------|-------------------------------------------------------------|
| PA14_23030 | PA3186      | <i>oprB</i>        | arabinose, arginine, galactose, glucose, glucuronate, lysine, xylose                                      | FEMS Microbiology Letters 8, 105-9 (1980), 9733092, 23066028 |                                                             |
| PA14_24790 | PA3038      | <i>opdQ, occK6</i> | benzoate, glucuronate, nitrate, pyroglutamate                                                             | 22369314, 22272184, 22824298                                 |                                                             |
| PA14_28400 | PA2760      | <i>oprQ, occD6</i> | arginine, dipterpenoids                                                                                   | 16352820, 17470813, 26578582                                 |                                                             |
| PA14_29220 | PA2700      | <i>opdB, occD7</i> | arginine, proline                                                                                         | 16352820, 26578582                                           |                                                             |
| PA14_32270 | PA2505      | <i>opdT, occD4</i> | tyrosine                                                                                                  | 16352820                                                     |                                                             |
| PA14_32640 | no ortholog |                    |                                                                                                           | This study                                                   | similar to <i>sphA</i>                                      |
| PA14_33380 | no ortholog |                    |                                                                                                           | This study                                                   | similar to <i>sphA</i>                                      |
| PA14_33410 | PA2420      | <i>opdJ, occD8</i> | arginine, aromatic amino acids                                                                            | 16352820, 17470813, 26578582                                 |                                                             |
| PA14_34960 | PA2291      | <i>opbA, oprB2</i> | glucose                                                                                                   | 26578582                                                     | similar to <i>oprB</i>                                      |
| PA14_36090 | PA2213      | <i>opdG, occK9</i> |                                                                                                           | 26578582                                                     |                                                             |
| PA14_37260 | PA2113      | <i>opdO, occK3</i> | benzoate, <b>cefotaxime</b> , glucuronate, pyroglutamate                                                  | 16352820, 22272184, 26578582                                 |                                                             |
| PA14_39000 | PA1974      |                    |                                                                                                           | 26578582                                                     |                                                             |
| PA14_39270 | PA1951      | <i>fapF</i>        | amyloid (secretion)                                                                                       | 23504942                                                     |                                                             |
| PA14_41570 | PA1777      | <i>oprF</i>        | non-specific, ferri-siderophores, nitrate, toluene                                                        | 12408810, 1322882, 1322952, 8611765, 26578582                | structural role in outer membrane and link to peptidoglycan |
| PA14_41750 | PA1764      | <i>fadL2</i>       |                                                                                                           | 26578582                                                     | similar to <i>fadL</i>                                      |
| PA14_47540 | PA1288      | <i>fadL</i>        | fatty acids                                                                                               | 23069386                                                     |                                                             |
| PA14_51070 | PA1025      | <i>opdD, occK7</i> | benzoate, glucuronate, <b>meropenem</b> , pyroglutamate                                                   | 26578582                                                     |                                                             |
| PA14_51880 | PA0958      | <i>oprD, occD1</i> | arginine, arginine-arginine, gluconate, histidine, <b>imipenem</b> , lysine, <b>meropenem</b> , ornithine | 1906263, 2109575, 2118530, 7639767, 8253668, 22272184        |                                                             |

|            |        |                    |                                                                                                                     |                                                              |                                                   |
|------------|--------|--------------------|---------------------------------------------------------------------------------------------------------------------|--------------------------------------------------------------|---------------------------------------------------|
| PA14_54520 | PA0755 | <i>opdH, occK5</i> | benzoate, <b>ceftazidime</b> , cis-<br>aconitate, glucuronate,<br>pyroglutamate, tricarboxylates,<br>vanillate      | 16352820,<br>17114261,<br>26578582                           |                                                   |
| PA14_55320 | PA0696 |                    |                                                                                                                     | 9714719                                                      | similar to<br>cyanobacterial<br>porin <i>somB</i> |
| PA14_58410 | PA4501 | <i>opdP, occD3</i> | arginine, <b>doripenem</b> , glycine-<br>glutamate, <b>imipenem</b> ,<br><b>meropenem</b>                           | 16352820,<br>16790014,<br>28440622,<br>25910245,<br>26578582 |                                                   |
| PA14_60730 | PA4589 | <i>fadL3</i>       |                                                                                                                     | 26578582                                                     | similar to <i>fadL</i>                            |
| PA14_64720 | PA4898 | <i>opdK, occK1</i> | adipate, benzoate, caproate,<br>glucuronate, histidine, 4-<br>nitrobenzoate, octanoate,<br>pyroglutamate, vanillate | 16352820,<br>18611376,<br>22272184,<br>26578582              |                                                   |
| PA14_70300 | PA5325 | <i>sphA</i>        | hydrophobic molecules,<br>sphingosine                                                                               | 24465209,<br>26149193                                        |                                                   |



**Table S2.** Secondary mutations in UCPBPP-PA14  $\Delta$ 40.

|                                                                       | Coordinates          | Change       | Locus PA14 | PA01 ortholog | Gene Product                               | Effect                       | AST* link | Comment                                                                                             |
|-----------------------------------------------------------------------|----------------------|--------------|------------|---------------|--------------------------------------------|------------------------------|-----------|-----------------------------------------------------------------------------------------------------|
| <b>gene loss</b>                                                      | 2,092,561..2,092,751 | Deletion     | PA14_24120 | PA3094.2      | tRNA-Asp                                   | Gene loss                    | No        | Loss of duplicate tRNA gene, identical to adjacent PA14_24130                                       |
| <b>non-synonymous</b>                                                 | 252,705              | G -> A       | PA14_02870 | PA0233        | probable transcriptional regulator         | D16N                         | No        | Non-conserved residue in HTH domain                                                                 |
|                                                                       | 6,425,382            | G -> A       | PA14_72090 | PA5461        | hypothetical protein                       | R26H                         | No        | Outside of identified domains                                                                       |
| <b>synonymous</b>                                                     | 2,473,090            | C -> T       | PA14_28710 | PA2739        | phenylalanyl-tRNA synthetase, beta subunit | silent change in codon 538   | No        |                                                                                                     |
|                                                                       | 2,960,130            | G -> C       | PA14_33610 | PA4225        | pyochelin synthetase PchF                  | silent change in codon 1,172 | Yes       | A transposon mutant has a two-fold increased MIC for ciprofloxacin (ref. 32)                        |
| <b>intergenic</b>                                                     | 1,455,338            | A -> G       | PA14_16990 | PA3662        | hypothetical protein                       | 82 bp upstream               | No        | No motif identified in pseudomonas.com                                                              |
|                                                                       | 4,957,532            | A -> G       | PA14_55640 | PA4281        | exonuclease SbcD                           | 318 bp upstream              | No        | No motif identified in pseudomonas.com                                                              |
|                                                                       | 4,957,549..4,957,550 | GC -> AT     | PA14_55640 | PA4281        | exonuclease SbcD                           | 300 bp upstream              | No        | No motif identified in pseudomonas.com                                                              |
|                                                                       | 5,931,608            | (T)6 -> (T)5 | PA14_66490 | PA1998        | transcriptional regulator DhcR             | 27 bp upstream               | No        | The mutated position is part of an inverted repeat in PA01, but the repeat is not conserved in PA14 |
| * Impact of gene inactivation on antimicrobial susceptibility testing |                      |              |            |               |                                            |                              |           |                                                                                                     |

**Table S3.** Strains and plasmids used in this study.

| <b>Strain</b>                          | <b>Description</b>                                          | <b>Resistance</b> | <b>Reference</b> |
|----------------------------------------|-------------------------------------------------------------|-------------------|------------------|
| <i>E. coli</i> SM10                    | Cloning strain                                              | KAN               |                  |
| <i>P. aeruginosa</i> PA14              | UCBBP-PA14 clinical strain                                  | None              | 14983043         |
| PA14 $\Delta occD1$                    | PA14 lacking <i>occD1</i> / <i>oprD</i>                     | None              | This study       |
| PA14 $\Delta oprF$                     | PA14 lacking <i>oprF</i>                                    | None              | This study       |
| PA14 <i>oprF</i> K188*                 | PA14 with <i>oprF</i> truncated after serine 187            | None              | This study       |
| PA14 <i>oprF</i> V315*                 | PA14 with <i>oprF</i> truncated after arginine 314          | None              | This study       |
| PA14 $\Delta 40$                       | PA14 lacking 40 porin genes                                 | None              | This study       |
| PA14 $\Delta 40$ / pJBOC- <i>occD1</i> | PA14 $\Delta 40$ expressing only <i>occD1</i> / <i>oprD</i> | GEN               | This study       |
| PA14 $\Delta 40$ / pJBOC- <i>occD2</i> | PA14 $\Delta 40$ expressing only <i>occD2</i> / <i>opdC</i> | GEN               | This study       |
| PA14 $\Delta 40$ / pJBOC- <i>occD3</i> | PA14 $\Delta 40$ expressing only <i>occD3</i> / <i>opdP</i> | GEN               | This study       |
| PA14 $\Delta 40$ / pJBOC- <i>occD5</i> | PA14 $\Delta 40$ expressing only <i>occD5</i> / <i>opdI</i> | GEN               | This study       |
| PA14 $\Delta 40$ / pJBOC- <i>occD6</i> | PA14 $\Delta 40$ expressing only <i>occD6</i> / <i>oprQ</i> | GEN               | This study       |
| PA14 $\Delta 40$ / pJBOC- <i>occK4</i> | PA14 $\Delta 40$ expressing only <i>occK4</i> / <i>opdL</i> | GEN               | This study       |
| PA14 $\Delta 40$ / pJBOC- <i>occK5</i> | PA14 $\Delta 40$ expressing only <i>occK5</i> / <i>opdH</i> | GEN               | This study       |
| PA14 $\Delta 40$ / pJBOC- <i>occK6</i> | PA14 $\Delta 40$ expressing only <i>occK6</i> / <i>opdQ</i> | GEN               | This study       |
| PA14 $\Delta 40$ / pJBOC- <i>occK7</i> | PA14 $\Delta 40$ expressing only <i>occK7</i> / <i>opdD</i> | GEN               | This study       |
| PA14 $\Delta 40$ / pJBOC- <i>occK8</i> | PA14 $\Delta 40$ expressing only <i>occK8</i> / <i>oprE</i> | GEN               | This study       |
| PA14 $\Delta 40$ / pJBOC- <i>oprG</i>  | PA14 $\Delta 40$ expressing only <i>oprG</i>                | GEN               | This study       |
| PA14 $\Delta 40$ / pJBOC- <i>oprO</i>  | PA14 $\Delta 40$ expressing only <i>oprO</i>                | GEN               | This study       |
| PA14 $\Delta 40$ / pJBOC- <i>tsx</i>   | PA14 $\Delta 40$ expressing only <i>tsx</i>                 | GEN               | This study       |
| PA14 $\Delta 40$ / pJBOC- <i>oprB</i>  | PA14 $\Delta 40$ expressing only <i>oprB</i>                | GEN               | This study       |
| PA14 $\Delta 40$ / pJBOC- <i>fadL</i>  | PA14 $\Delta 40$ expressing only <i>fadL</i>                | GEN               | This study       |
| <b>Plasmid</b>                         | <b>Description</b>                                          | <b>Resistance</b> | <b>Reference</b> |
| pAD6                                   | derivative of low copy-number plasmid PK2                   | AMP               | 20300602         |
| pEXG2                                  | suicide vector for gene deletion in <i>P. aeruginosa</i>    | GEN               | 15911752         |
| pEXG2 $\Delta occD1$                   | suicide vector for deleting <i>occD1</i>                    | GEN               | This study       |
| pEXG2 $\Delta occD2$                   | suicide vector for deleting <i>occD2</i>                    | GEN               | This study       |
| pEXG2 $\Delta occD3$                   | suicide vector for deleting <i>occD3</i>                    | GEN               | This study       |

|                            |                                                               |     |            |
|----------------------------|---------------------------------------------------------------|-----|------------|
| pEXG2 $\Delta occD4$       | suicide vector for deleting <i>occD4</i>                      | GEN | This study |
| pEXG2 $\Delta occD5$       | suicide vector for deleting <i>occD5</i>                      | GEN | This study |
| pEXG2 $\Delta occD6$       | suicide vector for deleting <i>occD6</i>                      | GEN | This study |
| pEXG2 $\Delta occD7$       | suicide vector for deleting <i>occD7</i>                      | GEN | This study |
| pEXG2 $\Delta occD8$       | suicide vector for deleting <i>occD8</i>                      | GEN | This study |
| pEXG2 $\Delta occK1$       | suicide vector for deleting <i>occK1</i>                      | GEN | This study |
| pEXG2 $\Delta occK2$       | suicide vector for deleting <i>occK2</i>                      | GEN | This study |
| pEXG2 $\Delta occK3$       | suicide vector for deleting <i>occK3</i>                      | GEN | This study |
| pEXG2 $\Delta occK4$       | suicide vector for deleting <i>occK4</i>                      | GEN | This study |
| pEXG2 $\Delta occK5$       | suicide vector for deleting <i>occK5</i>                      | GEN | This study |
| pEXG2 $\Delta occK6$       | suicide vector for deleting <i>occK6</i>                      | GEN | This study |
| pEXG2 $\Delta occK7$       | suicide vector for deleting <i>occK7</i>                      | GEN | This study |
| pEXG2 $\Delta occK8$       | suicide vector for deleting <i>occK8</i>                      | GEN | This study |
| pEXG2 $\Delta occK9$       | suicide vector for deleting <i>occK9</i>                      | GEN | This study |
| pEXG2 $\Delta occK10$      | suicide vector for deleting <i>occK10</i>                     | GEN | This study |
| pEXG2 $\Delta occK11$      | suicide vector for deleting <i>occK11</i>                     | GEN | This study |
| pEXG2 $\Delta oprG$        | suicide vector for deleting <i>oprG</i>                       | GEN | This study |
| pEXG2 $\Delta oprO$        | suicide vector for deleting <i>oprO</i>                       | GEN | This study |
| pEXG2 $\Delta oprP$        | suicide vector for deleting <i>oprP</i>                       | GEN | This study |
| pEXG2 $\Delta algE$        | suicide vector for deleting <i>algE</i>                       | GEN | This study |
| pEXG2 $\Delta tsx$         | suicide vector for deleting <i>tsx</i>                        | GEN | This study |
| pEXG2 $\Delta oprB$        | suicide vector for deleting <i>oprB</i>                       | GEN | This study |
| pEXG2 $\Delta oprB2$       | suicide vector for deleting <i>oprB2</i>                      | GEN | This study |
| pEXG2 $\Delta oprB3$       | suicide vector for deleting <i>oprB3</i>                      | GEN | This study |
| pEXG2 $\Delta fadL$        | suicide vector for deleting <i>fadL</i>                       | GEN | This study |
| pEXG2 $\Delta fadL2$       | suicide vector for deleting <i>fadL2</i>                      | GEN | This study |
| pEXG2 $\Delta fadL3$       | suicide vector for deleting <i>fadL3</i>                      | GEN | This study |
| pEXG2 $\Delta sphA$        | suicide vector for deleting <i>sphA</i>                       | GEN | This study |
| pEXG2 $\Delta PA14\_01770$ | suicide vector for deleting PA14_01770                        | GEN | This study |
| pEXG2 $\Delta PA14\_02890$ | suicide vector for deleting PA14_02890                        | GEN | This study |
| pEXG2 $\Delta PA14\_15280$ | suicide vector for deleting PA14_15280                        | GEN | This study |
| pEXG2 $\Delta lptF$        | suicide vector for deleting <i>lptF</i>                       | GEN | This study |
| pEXG2 $\Delta PA14\_32640$ | suicide vector for deleting PA14_32640                        | GEN | This study |
| pEXG2 $\Delta PA14\_33380$ | suicide vector for deleting PA14_33380                        | GEN | This study |
| pEXG2 $\Delta PA14\_39000$ | suicide vector for deleting PA14_39000                        | GEN | This study |
| pEXG2 $\Delta PA14\_39270$ | suicide vector for deleting PA14_39270                        | GEN | This study |
| pEXG2 $\Delta PA14\_55320$ | suicide vector for deleting PA14_55320                        | GEN | This study |
| pEXG2 $\Delta oprF$        | suicide vector for deleting <i>oprF</i>                       | GEN | This study |
| pEXG2 $\Delta oprF$ K188*  | suicide vector for truncating <i>oprF</i> after codon 187     | GEN | This study |
| pEXG2 $\Delta oprF$ V314*  | suicide vector for truncating <i>oprF</i> after codon 314     | GEN | This study |
| pJBOC                      | very low copy-number plasmid carrying the $P_{oprD}$ promoter | GEN | This study |

|                                     |                                  |     |            |
|-------------------------------------|----------------------------------|-----|------------|
| pJBOC <i>P<sub>oprD</sub>-occD1</i> | <i>occD1</i> -expression plasmid | GEN | This study |
| pJBOC <i>P<sub>oprD</sub>-occD2</i> | <i>occD2</i> -expression plasmid | GEN | This study |
| pJBOC <i>P<sub>oprD</sub>-occD3</i> | <i>occD3</i> -expression plasmid | GEN | This study |
| pJBOC <i>P<sub>oprD</sub>-occD5</i> | <i>occD5</i> -expression plasmid | GEN | This study |
| pJBOC <i>P<sub>oprD</sub>-occD6</i> | <i>occD6</i> -expression plasmid | GEN | This study |
| pJBOC <i>P<sub>oprD</sub>-occk4</i> | <i>occk4</i> -expression plasmid | GEN | This study |
| pJBOC <i>P<sub>oprD</sub>-occk5</i> | <i>occk5</i> -expression plasmid | GEN | This study |
| pJBOC <i>P<sub>oprD</sub>-occk6</i> | <i>occk6</i> -expression plasmid | GEN | This study |
| pJBOC <i>P<sub>oprD</sub>-occk7</i> | <i>occk7</i> -expression plasmid | GEN | This study |
| pJBOC <i>P<sub>oprD</sub>-occk8</i> | <i>occk8</i> -expression plasmid | GEN | This study |
| pJBOC <i>P<sub>oprD</sub>-oprG</i>  | <i>oprG</i> -expression plasmid  | GEN | This study |
| pJBOC <i>P<sub>oprD</sub>-oprO</i>  | <i>oprO</i> -expression plasmid  | GEN | This study |
| pJBOC <i>P<sub>oprD</sub>-tsx</i>   | <i>tsx</i> -expression plasmid   | GEN | This study |
| pJBOC <i>P<sub>oprD</sub>-oprB</i>  | <i>oprB</i> -expression plasmid  | GEN | This study |
| pJBOC <i>P<sub>oprD</sub>-fadL</i>  | <i>fadL</i> -expression plasmid  | GEN | This study |

**Table S4.** Primers used in this study.

| Plasmid              | Oligo                 | template | Sequence of relevant primers (5'-3')                  |
|----------------------|-----------------------|----------|-------------------------------------------------------|
| pEXG2                | JB-021 pEXG2 fw       | pEXG2    | ATAGTGAACGGCAGGTAAGC                                  |
|                      | JB-022 pEXG2 rv       | pEXG2    | TCAACGACAGGAGCACGATC                                  |
| pEXG2 $\Delta$ occD1 | JB OprD R1 f          | PA14     | CCAGTGCCAAGCTTACCGTCATTTCATGGACAGC                    |
|                      | JB OprD R1 Rv         | PA14     | TTTCGTTGCCTGTCGGTTCGATGTGATTGCTCCTTTGGTTTTG           |
|                      | JB OprD R3 f          | PA14     | AAACCAAGGAGCAATCACATCGACCCGACAGGCAACG                 |
|                      | JB OprD R3 Rv         | PA14     | GTACCCGGGGATCCGTGTAGAGACCCGAGGCCAG                    |
|                      | JB-005 OprD R1 Fw     | PA14     | AAGTCGCCGAGCAACAGGGTG                                 |
|                      | JB-006 OprD R3 Rv     | PA14     | CCGGCAGCGTTCATTTCTCTG                                 |
| pEXG2 $\Delta$ occD2 | JB-023 OccD2 R1 f     | PA14     | tgtaaagcaagcttGAAGAGTCCCTCGCTGATGACCAA                |
|                      | JB-024 OccD2 R1 Rv    | PA14     | AAGGGCCCAGCGCGCGGGGCTGCGGTTGCTCCTTCTTACA              |
|                      | JB-025 OccD2 R3 f     | PA14     | TGTAAGAAGGAGCAACCGCAGCCCGCGCTGGGCCCTT                 |
|                      | JB-026 OccD2 R3 Rv    | PA14     | gagcccggggatccGCCTGGGTGCAGCTTCTCTACGC                 |
|                      | JB-047 OccD2 R1 check | PA14     | CCAGATCCTTGTGCGCCGATAC                                |
|                      | JB-048 OccD2 R3 check | PA14     | ACCGCCCGATTCCCACCCTC                                  |
| pEXG2 $\Delta$ occD3 | JB-027 OccD3 R1 f     | PA14     | tgtaaagcaagcttGATGCGGGTGCAGCGTC                       |
|                      | JB-028 OccD3 R1 Rv    | PA14     | GGCCGCGGTTGTGCGAGGTCGATTGCTCCCTTTATTGTTGTCATGGC       |
|                      | JB-029 OccD3 R3 f     | PA14     | ACAATAAAGGGAGCAATCAGACCTGCGACAACCGGCGG                |
|                      | JB-030 OccD3 R3 Rv    | PA14     | gagcccggggatccCTTGCGGTAGCGCTTGAAGACG                  |
|                      | JB-049 OccD3 R1 check | PA14     | TGACGAAACCATCAAGGACG                                  |
|                      | JB-050 OccD3 R3 check | PA14     | ATGGCGAACACCAGATTGTC                                  |
| pEXG2 $\Delta$ occD4 | JB-031 OccD4 R1 f     | PA14     | tgtaaagcaagcttTGCCGCTTCTTCCGCCAGG                     |
|                      | JB-032 OccD4 R1 Rv    | PA14     | GATGGGGCGCGCGCGCCTGGCGATTGCTCCAGATCGGTTTCATGTCTG      |
|                      | JB-033 OccD4 R3 f     | PA14     | ACCGATCTGAGCAATCGCCAGGCGCGCCGCCGCCCATC                |
|                      | JB-034 OccD4 R3 Rv    | PA14     | gagcccggggatccTCGCGGCCATCAGCCGCCAGC                   |
|                      | JB-051 OccD4 R1 check | PA14     | GGGCATTGCAGGAGTAAGGTGG                                |
|                      | JB-052 OccD4 R3 check | PA14     | CTGTCGTCGGCGTTCAGCAC                                  |
| pEXG2 $\Delta$ occD5 | JB-035 OccD5 R1 f     | PA14     | tgtaaagcaagcttTATCTCGCGTGCAGCCGGGCTC                  |
|                      | JB-036 OccD5 R1 Rv    | PA14     | CAGGTGGGAGAAAACAATAACGCCCGGGCCGGGCTC                  |
|                      | JB-037 OccD5 R3 f     | PA14     | CCGAGCCGCGGCCCGGGCGTTATTGTTTTCTCCACCTGAGTGCCAGG       |
|                      | JB-038 OccD5 R3 Rv    | PA14     | gagcccggggatccGGACTCCCCCTCCGGCGGCG                    |
|                      | JB-053 OccD5 R1 check | PA14     | GCATCATCGGCAAGTCC                                     |
|                      | JB-054 OccD5 R3 check | PA14     | GGCCTTGAAGTAGTGTCCATG                                 |
| pEXG2 $\Delta$ occD6 | JB OprQ R1 f          | PA14     | AGGTCGACTCTAGACTGCATCATCACCCCGGAAGGC                  |
|                      | JB OprQ R1 Rv         | PA14     | CAACAACCAGGAACAATAAGTCAAACCTGCGAGCGCGACG              |
|                      | JB OprQ R3 f          | PA14     | CGTCGCGCTCGCAGGTTTGACTTATTGTTCTCGTTGTTGGC             |
|                      | JB OprQ R3 Rv         | PA14     | GTACCCGGGGATCCCTCTTCCCTTCTCTCGCG                      |
|                      | JB-013 OprQ R1 Fw     | PA14     | GGCAAGTGGGAGGTGAACACTAG                               |
|                      | JB-014 OprQ R3 Rv     | PA14     | ATCGTTCTGCGGCCATCCTC                                  |
| pEXG2 $\Delta$ occD7 | JB-039 OccD7 R1 f     | PA14     | tgtaaagcaagcttACCGCGGCACCAACACCGA                     |
|                      | JB-040 OccD7 R1 Rv    | PA14     | CCTCGCCCGGAGTTTTCCCGCCATGACCGCACCCGCGCC               |
|                      | JB-041 OccD7 R3 f     | PA14     | GGCGGCGGGTGCGGTCATGGCGGGAAAACCTCCGGGCGAGGGC           |
|                      | JB-042 OccD7 R3 Rv    | PA14     | gagcccggggatccCCGCATGGCCTTCCAGGGCG                    |
|                      | JB-055 OccD7 R1 check | PA14     | TTCGCCGCGCACGATCAGG                                   |
|                      | JB-056 OccD7 R3 check | PA14     | GCGCAACATCGAGCGGGTG                                   |
| pEXG2 $\Delta$ occD8 | JB-043 OccD8 R1 f     | PA14     | tgtaaagcaagcttTCGCGTGCAGCGCCTG                        |
|                      | JB-044 OccD8 R1 Rv    | PA14     | AACGACTACGGACCGGACCCACCCAGGAACCAGAAAAAGAGA            |
|                      | JB-045 OccD8 R3 f     | PA14     | TTTTTTCTGGTTCCGTGGGTGGTCCGGTCCGTAGTCGTT               |
|                      | JB-046 OccD8 R3 Rv    | PA14     | gagcccggggatccGTTGCTGATCGACCACCAGAGC                  |
|                      | JB-057 OccD8 R1 check | PA14     | GCGCTGATCTGTTCAACTGG                                  |
|                      | JB-058 OccD8 R3 check | PA14     | GCCAACCTCAACGGCCAG                                    |
| pEXG2 $\Delta$ occK1 | JB OpdK R1 f          | PA14     | CCAGTGCCAAGCTTGATGACCTTCAGCAACACCGACAG                |
|                      | JB OpdK R1 Rv         | PA14     | AAAAACGGAGCACAAATAACACGGACGCTGTCTCGCCGCTC             |
|                      | JB OpdK R3 f          | PA14     | GAGCGGCGAGACAGCGTCCGTGTTATTGTGCTCCGTTTTT              |
|                      | JB OpdK R3 Rv         | PA14     | GTACCCGGGGATCCCGATCAACCGTATCATCGTC                    |
|                      | JB-103 OccK1 R1       | PA14     | GCTGGCCTACTTCAACAACAC                                 |
|                      | JB-104 OccK1 R3       | PA14     | CTGGAGCAGGCGGTAATG                                    |
| pEXG2 $\Delta$ occK2 | JB-059 OccK2 R1 f     | PA14     | ttcacacattatacagccggaagcataaatgtaaagcaCTCGGGTATCCGCAC |
|                      | JB-060 OccK2 R1 Rv    | PA14     | AAGAACGAAGGGGACACTCCAGCCTACGCGCCGAC                   |
|                      | JB-061 OccK2 R3 f     | PA14     | ACGGGGTCGGCGCGTAGGCTGGGAGTGTCCCTTCGTTCTTCTCTAGG       |
|                      | JB-062 OccK2 R3 rv    | PA14     | ggaaattaataaggtaccgaattcgagctcgagccgggAGGAGCCGCCCGC   |
|                      | JB-105 OccK2 R1       | PA14     | CCAAGTTCCTTCCGGTTTT                                   |
|                      | JB-106 OccK2 R3       | PA14     | GTGGCGCAACTACTACAACC                                  |

|               |                     |      |                                                             |
|---------------|---------------------|------|-------------------------------------------------------------|
| pEXG2 ΔoccK3  | JB-063 OccK3 R1 f   | PA14 | ttccacacattatacagagccggaagcataaatgtaaagcaGGTGGTGCGTCCGGCT   |
|               | JB-064 OccK3 R1 Rv  | PA14 | AGGTCAATTGCTCGCCGACCGCTGGGGTTTCCTCGGT                       |
|               | JB-065 OccK3 R3 f   | PA14 | TCGACCGAGAAACCCAGCGGTCCGGCCGAGCAATGAC                       |
|               | JB-066 OccK3 R3 rv  | PA14 | ggaaattaattaaggtaccgaattcgagctcgagcccgggGTCTGCGCCTCCAGCG    |
|               | JB-107 OccK3 R1     | PA14 | CCGCCATCCTCTACTCGCTG                                        |
| pEXG2 ΔoccK4  | JB-108 OccK3 R3     | PA14 | GTTGGCTCATGCCGCCCTC                                         |
|               | JB-067 OccK4 R1 f   | PA14 | ttccacacattatacagagccggaagcataaatgtaaagcaGGCTGCACCCTGCAAC   |
|               | JB-068 OccK4 R1 Rv  | PA14 | AACAACCAAGGGAAGAATCGAGCGCGGCCCT                             |
|               | JB-069 OccK4 R3 f   | PA14 | CGGCCCAAGGGGCGCGCTCGATTCTCCCTTGTTGTTGTTCTTTGTAGG            |
|               | JB-070 OccK4 R3 rv  | PA14 | ggaaattaattaaggtaccgaattcgagctcgagcccgggCACCTCAGCAGGACCAG   |
|               | JB-109 OccK4 R1     | PA14 | GTTCCGCTACACCCTGCTGC                                        |
| pEXG2 ΔoccK5  | JB-110 OccK4 R3     | PA14 | AACGGATAGAGGTCCGCGCAC                                       |
|               | JB-071 OccK5 R1 f   | PA14 | ttccacacattatacagagccggaagcataaatgtaaagcaGGGCGATCATCGCTCCAG |
|               | JB-072 OccK5 R1 Rv  | PA14 | TGTGGAGTTCTTGTCTGGCGCAGTGGTCTCCGATTCTTGT                    |
|               | JB-073 OccK5 R3 f   | PA14 | CAAGAATCGGAGACCACTGCGCCAGAACAAGAACTCCACAGG                  |
|               | JB-074 OccK5 R3 rv  | PA14 | ggaaattaattaaggtaccgaattcgagctcgagcccgggAGGCGCATGTCGCC      |
| pEXG2 ΔoccK6  | JB-111 OccK5 R1     | PA14 | GATCTCGATGGCGTCCGGCTGG                                      |
|               | JB-112 OccK5 R3     | PA14 | ACCCGCGAACTACCGGCCAGAC                                      |
|               | JB-075 OccK6 R1 f   | PA14 | tatacagagccggaagcataaatgtaaagcaGGGGTCAGCGGGCTG              |
|               | JB-076 OccK6 R1 Rv  | PA14 | GAGGAGACAATAACACGGCAGGCCCG                                  |
|               | JB-077 OccK6 R3 f   | PA14 | CGCGGGCCTGCCGTGTTATTGTCTCCTCGAGCGCTTGGG                     |
|               | JB-078 OccK6 R3 rv  | PA14 | taaggtaccgaattcgagctcgagcccgggCGATCGCATCCTGCTGTCC           |
| pEXG2 ΔoccK7  | JB-015 OpdQ R1 Fw   | PA14 | CGTCGAGCATCCCGTTCCTG                                        |
|               | JB-016 OpdQ R3 Rv   | PA14 | TCGCTTACCAGAAAGTCGTCC                                       |
|               | JB-079 OccK7 R1 f   | PA14 | ttccacacattatacagagccggaagcataaatgtaaagcaTACCTGGCCGCGCG     |
|               | JB-080 OccK7 R1 Rv  | PA14 | ACGACGAAGAGACAACAACAAGCGACTTGAGTTTCCCG                      |
|               | JB-081 OccK7 R3 f   | PA14 | TCGGGAACTCAAGTCCGCTTGTGTGTCTCTTCGTCGTGATGATAGACAC           |
| pEXG2 ΔoccK8  | JB-082 OccK7 R3 rv  | PA14 | ggaaattaattaaggtaccgaattcgagctcgagcccgggCCACAAGTGCACCGCC    |
|               | JB-113 OccK7 R1     | PA14 | GAAGAGAACGTCGCCGAGAAC                                       |
|               | JB-114 OccK7 R3     | PA14 | CGTGCAGCCATCATCGAGG                                         |
|               | JB OprE R1 f        | PA14 | CCAGTGCCAAGCTTGAGGGCTCGGTGCCCTCTAC                          |
| pEXG2 ΔoccK9  | JB OprE R1 Rv       | PA14 | TTCCATGCCTGGCCGGCCCTGGTCTTTTCCCAATTGGATTGTC                 |
|               | JB OprE R3 f        | PA14 | TACCAATGGGAAAAGACCAGGCGCCGCCAGGCATGAAAAAG                   |
|               | JB OprE R3 Rv       | PA14 | GTACCCGGGATCCATCACCCAGGGAATGCCTGCTC                         |
|               | JB-007 OprE R1 Fw   | PA14 | TTCCAGGAGGGCGAACAAG                                         |
|               | JB-008 OprE R3 Rv   | PA14 | GCTACCGCACCGACGACTTC                                        |
| pEXG2 ΔoccK10 | JB-083 OccK9 R1 f   | PA14 | ttccacacattatacagagccggaagcataaatgtaaagcaTGGAACTCCAGCAGCCAG |
|               | JB-084 OccK9 R1 Rv  | PA14 | TGGGAAAAGGAAAACAACAGCGCAGGGCCGT                             |
|               | JB-085 OccK9 R3 f   | PA14 | CAGCGAGAACGGCCCTGCGCTGTTGTTTTTCCCTTTTCCAGGCCGAAGC           |
|               | JB-086 OccK9 R3 rv  | PA14 | ggaaattaattaaggtaccgaattcgagctcgagcccgggGACGACCTCTGACCTCGCG |
|               | JB-115 OccK9 R1     | PA14 | AGGCCCTCGGTGACGAACAG                                        |
|               | JB-116 OccK9 R3     | PA14 | GTTGCACTGGTTCGCCGAGC                                        |
| pEXG2 ΔoccK11 | JB-087 OccK10 R1 f  | PA14 | ttccacacattatacagagccggaagcataaatgtaaagcaCTGGGACTTACCCCGCC  |
|               | JB-088 OccK10 R1 Rv | PA14 | CCGCTGTCGAGAGTCAACCGCGCCGTCGCGCCGAACG                       |
|               | JB-089 OccK10 R3 f  | PA14 | GTGCGTTCGGCGCGACGGCGCGGTACTCTCGACAGCGGG                     |
|               | JB-090 OccK10 R3 rv | PA14 | ggaaattaattaaggtaccgaattcgagctcgagcccgggCTTCCAGGTGGACGAGCC  |
|               | JB-117 OccK10 R1    | PA14 | CGGACATCGCCAACGCCATC                                        |
|               | JB-118 OccK10 R3    | PA14 | ATGCTCGACCTCGCCGAC                                          |
| pEXG2 ΔoprG   | JB-091 OccK11 R1 f  | PA14 | ttccacacattatacagagccggaagcataaatgtaaagcaTCCAGGCGCGCTAC     |
|               | JB-092 OccK11 R1 Rv | PA14 | GCCGCCAAGGGCTGAGCGGCACGCACTCCGAACGGG                        |
|               | JB-093 OccK11 R3 f  | PA14 | GGCGCCGTTCCGGAGTGCCTGCCGCTCAGCCCTTGG                        |
|               | JB-094 OccK11 R3 rv | PA14 | ggaaattaattaaggtaccgaattcgagctcgagcccgggTCCGACCCGCCGAGC     |
|               | JB-119 OccK11 R1    | PA14 | GAGACCGGCGACAACGTGG                                         |
| pEXG2 ΔoprO   | JB-120 OccK11 R3    | PA14 | AGCCGGTACGCTTACCAG                                          |
|               | JB OprG R1 f        | PA14 | CCAGTGCCAAGCTTATTTCTGGTCCAGGCGCTG                           |
|               | JB OprG R1 Rv       | PA14 | TACAAGGAATGGAGCTCATCGTCTGACTGTGCGGGGC                       |
|               | JB OprG R3 f        | PA14 | GCCCCGCGACAGTCTACGACGATGAGCTCCATTCCTTGTATTAG                |
|               | JB OprG R3 Rv       | PA14 | GTACCCGGGATCTGTGATCCGCCTATGAC                               |
|               | JB-011 OprG R1 Fw   | PA14 | AGACCCGCGACTTCATCTAC                                        |
| pEXG2 ΔoprP   | JB-012 OprG R3 Rv   | PA14 | CTATGAGTGGAGCTGCTCG                                         |
|               | JB-298 OprO R1 F    | PA14 | ttccacacattatacagagccggaagcataaatgtaaagcaAGCTTGCCACCATCGA   |
|               | JB-299 OprO R1 R    | PA14 | gagcagatggttgccttccgaagattccc                               |
|               | JB-300 OprO R3 F    | PA14 | ccattaaggggaaatctcggaagcgacaacg                             |
|               | JB-301 OprO R3 R    | PA14 | ggaaattaattaaggtaccgaattcgagctcgagcccgggatccGTATTGCCGTTG    |
| pEXG2 ΔoprP   | JB-306 OprO F       | PA14 | gcgctgtacctggcgccg                                          |
|               | JB-307 OprO R       | PA14 | agtcacggtagacgggtgcgccc                                     |
|               | JB-302 OprP R1 F    | PA14 | ttccacacattatacagagccggaagcataaatgtaaagcaAGCTTCTACCCATATC   |

|                   |                            |      |                                                                             |
|-------------------|----------------------------|------|-----------------------------------------------------------------------------|
|                   | JB-303 OprP R1 R           | PA14 | cgggacggggcccagcgcgccaggttaagtc                                             |
|                   | JB-304 OprP R3 F           | PA14 | cgaacaggggacttacctggcgctcgggccc                                             |
|                   | JB-305 OprP R3 R           | PA14 | ggaaattaattaaggtaccgaattcgagctcgagcccgggatccTTCGTTGACGTC                    |
|                   | JB-308 OprP F              | PA14 | cggcgccggcaagtggtt                                                          |
|                   | JB-309 OprP R              | PA14 | acgctgggtagccatcgccac                                                       |
| pEXG2 ΔalgE       | JB-292 AlgE R1 F           | PA14 | ttccacacattatacagccggaagcataaatgtaaagcaAGCTTCAGGCCGGCTCC                    |
|                   | JB-293 AlgE R1 R           | PA14 | gaagaagagccagaagaagcctgcccccagga                                            |
|                   | JB-294 AlgE R3 F           | PA14 | gtccggttcctcgcgggcaggttctggc                                                |
|                   | JB-295 AlgE R3 R           | PA14 | ggaaattaattaaggtaccgaattcgagctcgagcccgggatccGGGTGACACTCGG                   |
|                   | JB-296 AlgE F              | PA14 | tacacctggcgccgccccca                                                        |
|                   | JB-297 AlgE R              | PA14 | agaaggccctgctgaacag                                                         |
| pEXG2 Δtsx        | JB-127 TsX R1 F            | PA14 | ttccacacattatacagccggaagcataaatgtaaagcaGCACCGATTGCGAGATCG                   |
|                   | JB-128 TsX R1 Rv           | PA14 | GGCAGCCCCGCGGACGACTGAAACGCTCCTGGAGTGAATAGCTTTTTTCTAGTGG                     |
|                   | JB-129 TsX R3 F            | PA14 | TTCACCTCCAGGAGCGTTTCAGTCCGTCGCGCGG                                          |
|                   | JB-130 TsX R3 Rv           | PA14 | ggaaattaattaaggtaccgaattcgagctcgagcccgggGACGATGCCGGTGACCAG                  |
|                   | JB-131 TsX R1              | PA14 | CGGCCAGATCGTCTGTC                                                           |
|                   | JB-132 TsX R3              | PA14 | GCCGAGGTCGGTGATGC                                                           |
| pEXG2 ΔoprB       | JB-172 OprB R1 f           | PA14 | ttccacacattatacagccggaagcataaatgtaaagcaagcttAAGCTGCGGGTGAAATGCG             |
|                   | JB OprB R1 Rv              | PA14 | CGGAGCAGGCAACGCGACGGTTCCAGCGTCTCGTGGTTG                                     |
|                   | JB OprB R3 f               | PA14 | CAACCAGGAGGACGCTGGAACCGTCCGTTGCTGCTCGC                                      |
|                   | JB-173 OprB R3 Rv          | PA14 | ggaaattaattaaggtaccgaattcgagctcgagcccgggatccGGGCTGCAGGGCGAAGCTG             |
|                   | JB-095 OprB R1             | PA14 | GCGGCCAAGGTCTACCTG                                                          |
|                   | JB-096 OprB R3             | PA14 | CTCCAGCTCCATGCCGTGC                                                         |
| pEXG2 ΔoprB2      | JB-174 OprB2 R1 f          | PA14 | ttccacacattatacagccggaagcataaatgtaaagcaagcttGCGGGTCGCCAAGGCGAC              |
|                   | JB OprB2 R1 Rv             | PA14 | CGGTTGTCCGAAGCAACGCGCAACGCTTCCCTCGTTGCGAATGG                                |
|                   | JB OprB2 R3 f              | PA14 | CGCAACGAGGAAGCGTTGCGCTGTTGCTTCGGACAACCGC                                    |
|                   | JB-175 OprB2 R3 Rv         | PA14 | ggaaattaattaaggtaccgaattcgagctcgagcccgggatccAGTAGCGGTGCGCGAAGCTCGGTG        |
|                   | JB-097 OprB2 R1            | PA14 | GCCATCCCATCGGCAACCTG                                                        |
|                   | JB-098 OprB2 R3            | PA14 | GTACGGATGCGCCAGGCTTC                                                        |
| pEXG2 ΔoprB3      | JB-166 OprB3 R1 f          | PA14 | ggaaagcataaatgtaaagcaagcttGAAGTCGGCTTGTACGGC                                |
|                   | JB-167 OprB3 R1 Rv         | PA14 | GCCTTGCCCGCGCCACCTGGCA                                                      |
|                   | JB-168 OprB3 R3 f          | PA14 | TGGCGCGGCAAGGCACTCGTCTTG                                                    |
|                   | JB-169 OprB3 R3 Rv         | PA14 | gagctcgagcccgggatccCGTCCGCTCGGCC                                            |
|                   | JB-099 OprB3 R1            | PA14 | GTTCCGCTTGACCTGGGTG                                                         |
|                   | JB-100 OprB3 R3            | PA14 | AGCAGGTGCTGGTCACTGG                                                         |
| pEXG2 ΔfadL       | JB FadL R1 f               | PA14 | CCAGTGCCAAGCTTTTTCGCGGAGGCCGTCATG                                           |
|                   | JB FadL R1 Rv              | PA14 | TTTTTCGTTGGCGCTGCGATGTTGGAGCAACTCCTGTGATAACGG                               |
|                   | JB FadL R3 f               | PA14 | ACACAGGAGTTGCTCCAACATCGCACGCGCAACGAAAAAG                                    |
|                   | JB FadL R3 Rv              | PA14 | GTACCCGGGATCCGCTGCTGGAAGTGGGCATGG                                           |
|                   | JB-017 FadL R1 Fw          | PA14 | GGGCCATCGGAATAGAAGCTGC                                                      |
|                   | JB-018 FadL R3 Rv          | PA14 | CTGCTGGGACTCGCCTGGTG                                                        |
| pEXG2 ΔfadL2      | JB-121 FadL2 R1 F          | PA14 | ttccacacattatacagccggaagcataaatgtaaagcaTTGCAGGTCTGGTAGAGATCG                |
|                   | JB-122 FadL2 R1 Rv         | PA14 | ACCCGCGAGCGAGGCTGTTGGGCTGGAGCATGATGCG                                       |
|                   | JB-123 FadL2 R3 F          | PA14 | CGGCGATCATGCTCCAGCCCAACAGGCCCTCGCTCGCGG                                     |
|                   | JB-124 FadL2 R3 Rv         | PA14 | ggaaattaattaaggtaccgaattcgagctcgagcccgggTTCGACTACGGGATCTGGGACAAC            |
|                   | JB-125 FadL2 R1            | PA14 | TGGCATCCAGTTCGGTGAAATC                                                      |
|                   | JB-126 FadL2 R3            | PA14 | AAGACCAGCGCGGCAC                                                            |
| pEXG2 ΔfadL3      | JB FadL3 R1 f              | PA14 | CCAGTGCCAAGCTTGCCCTTCGGATCGAAGTCGGAG                                        |
|                   | JB FadL3 R1 Rv             | PA14 | GCCTGTTTGCCAGAAAACCAACCCGGCCGTAGGCAGAGAAAAG                                 |
|                   | JB FadL3 R3 f              | PA14 | TTCTCTGCTACGGCCGGGTTGGTTTTCTGGCAAACAGGC                                     |
|                   | JB FadL3 R3 Rv             | PA14 | GTACCCGGGATCCCTGAGCGTTTCGTCCATGGC                                           |
|                   | JB-101 FadL3 R1            | PA14 | CGGTACAGCTCGCTCATG                                                          |
|                   | JB-102 FadL3 R3            | PA14 | GCCAACTCACTGGAAGGATAC                                                       |
| pEXG2 ΔsphA       | JB-330 PA14_70300 R1 Fw    | PA14 | ttccacacattatacagccggaagcataaatgtaaagcaagcttaccaccagcaggctggcgaagaactcctcga |
|                   | JB-331 PA14_70300 R1 Rv    | PA14 | tgccgcttcgctccgatccggcgccgctcttattatgtttgg                                  |
|                   | JB-332 PA14_70300 R3 Fw    | PA14 | acaataataagagcccggccatcggaacgaagcgg                                         |
|                   | JB-333 PA14_70300 R3 Rv    | PA14 | ggaaattaattaaggtaccgaattcgagctcgagcccgggatccatgggctacgaccct                 |
|                   | JB-334 PA14_70300 R1 check | PA14 | agcggcatggatgagttcgatg                                                      |
|                   | JB-335 PA14_70300 R3 check | PA14 | ctgggtgaattgctggcgct                                                        |
| pEXG2 ΔPA14_01770 | JB-492 PA14_01770 R1F      | PA14 | ttccacacattatacagccggaagcataaatgtaaagcaagcttGCCGCTGCGCGAAGGCAAC             |
|                   | JB-493 PA14_01770 R1R      | PA14 | TTCCCATGCGCAAAGCCCTGGGCTACGCGTTCTGAGCG                                      |
|                   | JB-494 PA14_01770 R3F      | PA14 | CGCGCTCAGAACCGGTAGCCAGGGCTTTGCGCATGGGAAGTCCT                                |

|                      |                            |      |                                                                       |
|----------------------|----------------------------|------|-----------------------------------------------------------------------|
|                      | JB-495 PA14_01770 R3R      | PA14 | ggaaattaattaaggtaccgaattcgagctcgagcccgggatccCGGCATCCTGGGGGA           |
|                      | JB-496 PA14_01770 R1 check | PA14 | CCGCCGACGTACACGGCA                                                    |
|                      | JB-497 PA14_01770 R3 check | PA14 | CCTGGCATGTCGCTTGCTG                                                   |
| pEXG2<br>ΔPA14_02890 | JB-318 PA14_02890 R1 Fw    | PA14 | ttcacacattatacagccggaagcataaatgtaaagcaagcttgcgcggtgacct               |
|                      | JB-319 PA14_02890 R1 Rv    | PA14 | tagggcgcgcgccatcgccgtgtgtct                                           |
|                      | JB-320 PA14_02890 R3 Fw    | PA14 | caaccagcaggacacacagcggtgagccgc                                        |
|                      | JB-321 PA14_02890 R3 Rv    | PA14 | ggaaattaattaaggtaccgaattcgagctcgagcccgggatcccgccgaccctgct             |
|                      | JB-322 PA14_02890 R1 check | PA14 | cggacatcacgctcggtcacc                                                 |
|                      | JB-323 PA14_02890 R3 check | PA14 | agcagacggtgacggcccgc                                                  |
| pEXG2<br>ΔPA14_15280 | JB-498 PA14_15280 R1F      | PA14 | ttcacacattatacagccggaagcataaatgtaaagcaagcttTGATATAGAAGGTGAGCACGGCGAGG |
|                      | JB-499 PA14_15280 R1R      | PA14 | GTCACATGACCCACCGCACCGTCCATGTGTTCTGAGGAGGCG                            |
|                      | JB-500 PA14_15280 R3F      | PA14 | CCTCCTCAGAACACATGGACGGTGCGGTGGGTCA                                    |
|                      | JB-501 PA14_15280 R3R      | PA14 | ggaaattaattaaggtaccgaattcgagctcgagcccgggatccTCGCCCTCTATCGCACGC        |
|                      | JB-502 PA14_15280 R1 check | PA14 | ACCGATCCCCGCGCC                                                       |
|                      | JB-503 PA14_15280 R3 check | PA14 | GACATCGGTGAGCTGCTCTGC                                                 |
| pEXG2<br>ΔPA14_16630 | JB-360 PA14_16630 R1 Fw    | PA14 | ttcacacattatacagccggaagcataaatgtaaagcaagcttggtgtgctgacaccgagcagaaggg  |
|                      | JB-361 PA14_16630 R1 Rv    | PA14 | cggtattaaggtgaccccttaagccctacggaagcccaaaag                            |
|                      | JB-362 PA14_16630 R3 Fw    | PA14 | ttggcttccgtagggttaaggggtatccttaacacgaat                               |
|                      | JB-363 PA14_16630 R3 Rv    | PA14 | ggaaattaattaaggtaccgaattcgagctcgagcccgggatccacggcggtccgacgaccgcccgc   |
|                      | JB-364 PA14_16630 R1 check | PA14 | gtgaagctgctccctggagcc                                                 |
|                      | JB-365 PA14_16630 R3 check | PA14 | ccgtggtgcccgcctca                                                     |
| pEXG2<br>ΔPA14_32640 | JB-504 PA14_32640 R1F      | PA14 | ttcacacattatacagccggaagcataaatgtaaagcaagcttCCGGGCAGATCAACCCG          |
|                      | JB-505 PA14_32640 R1R      | PA14 | CGCCCATGACCACCCGCATCCGCTACTCGCAGGTCTTCTG                              |
|                      | JB-506 PA14_32640 R3F      | PA14 | CAGAAGACCTGCGAGTAGCGGATGCGGGTGGTCAT                                   |
|                      | JB-507 PA14_32640 R3R      | PA14 | ggaaattaattaaggtaccgaattcgagctcgagcccgggatccTCAGCTCTACAGCTTCTTCAACAG  |
|                      | JB-508 PA14_32640 R1 check | PA14 | GCAACTGCTGCCCTGGGG                                                    |
|                      | JB-509 PA14_32640 R3 check | PA14 | CCGGGCCAGGCCTTCTT                                                     |
| pEXG2<br>ΔPA14_33380 | JB-510 PA14_33380 R1F      | PA14 | ttcacacattatacagccggaagcataaatgtaaagcaagcttCTGTTTGTGTTAGCGGGT         |
|                      | JB-511 PA14_33380 R1R      | PA14 | CCCTCATGCGTGCAGCCCTGCTGCTGGCGTTCTGAATCGG                              |
|                      | JB-512 PA14_33380 R3F      | PA14 | CCGATTGAGAACGCCAGCAGCAGGGCTGCACG                                      |
|                      | JB-513 PA14_33380 R3R      | PA14 | ggaaattaattaaggtaccgaattcgagctcgagcccgggatccGCCGATGACCGAAGTGGC        |
|                      | JB-514 PA14_33380 R1 check | PA14 | GACGATTCTGTTACCTCGGGGTTGGA                                            |
|                      | JB-515 PA14_33380 R3 check | PA14 | ACGCCGCCATGTTGCTGATC                                                  |
| pEXG2<br>ΔPA14_39000 | JB-324 PA14_39000 R1 Fw    | PA14 | ttcacacattatacagccggaagcataaatgtaaagcaagcttcagccagggtgaccag           |
|                      | JB-325 PA14_39000 R1 Rv    | PA14 | ttcacctcgaggtagtgcctaccgctacttgaaggaccccgc                            |
|                      | JB-326 PA14_39000 R3 Fw    | PA14 | gtccttgaagtagcgttaggcgactccgcg                                        |
|                      | JB-327 PA14_39000 R3 Rv    | PA14 | ggaaattaattaaggtaccgaattcgagctcgagcccgggatccgctgcacgaaccgg            |
|                      | JB-328 PA14_39000 R1 Check | PA14 | gcgggtcaccaccaactttgc                                                 |
|                      | JB-329 PA14_39000 R3 check | PA14 | tgtctgctcgctccctcg                                                    |
| pEXG2<br>ΔPA14_39270 | JB-516 PA14_39270 R1F      | PA14 | ttcacacattatacagccggaagcataaatgtaaagcaagcttGTTGCGCGGGCGCTAC           |
|                      | JB-517 PA14_39270 R1R      | PA14 | GCCCCTCAGAAGTAGTAGGGGAGTGTCTGGGTGATGTTTGCC                            |
|                      | JB-518 PA14_39270 R3F      | PA14 | CAAACATGACCCAGACACTCCCTACTACTTCTGAGGGGC                               |
|                      | JB-519 PA14_39270 R1F      | PA14 | ggaaattaattaaggtaccgaattcgagctcgagcccgggatccCACGAACACTTGTGAGGC        |
|                      | JB-520 PA14_39270 R1 check | PA14 | CCGCCAGCGACCTCTTCG                                                    |
|                      | JB-521 PA14_39270 R3 check | PA14 | ACGCCATCGTCATCGTCGC                                                   |



|                      |                                                                                                                                                                      |                                                                                                    |                                                                                                                                                                                                                                                                                                                                                                                                                                                                                                   |
|----------------------|----------------------------------------------------------------------------------------------------------------------------------------------------------------------|----------------------------------------------------------------------------------------------------|---------------------------------------------------------------------------------------------------------------------------------------------------------------------------------------------------------------------------------------------------------------------------------------------------------------------------------------------------------------------------------------------------------------------------------------------------------------------------------------------------|
| pEXG2<br>ΔPA14_55320 | JB-366 PA14_55320 R1 Fw<br>JB-367 PA14_55320 R1 Rv<br>JB-368 PA14_55320 R3 Fw<br>JB-369 PA14_55320 R3 Rv<br>JB-370 PA14_55320 R1 check<br>JB-371 PA14_55320 R3 check | PA14<br>PA14<br>PA14<br>PA14<br>PA14<br>PA14                                                       | ttcacacattatacagccggaagcataaatgtaaagcaagcttattcactggcgagcgc<br>accttaggagccgtacacagcgctcctcgaggcag<br>tggctgctcgaggagccgctgtgtacggctcctaaggctct<br>ggaaattaataaggtaccgaattcgagctcgagccgggatccgctgctgctcgccgc<br>gacggaaagggttcgatcaggg<br>ctgtccatcgacggccacc                                                                                                                                                                                                                                     |
| pEXG2 ΔoprF          | JB OprF R1 f<br>JB OprF R1 Rv<br>JB OprF R3 f<br>JB OprF R3 Rv<br>JB-009 OprF R1 Fw<br>JB-010 OprF R3 Rv                                                             | PA14<br>PA14<br>PA14<br>PA14<br>PA14<br>PA14                                                       | CCAGTGCCAAGCTTATTTGGTCAACCCGAGCATACTGG<br>TCAAGATGGGGATTTAACCGTTCGGCTGAGCCTCTAAGGAAAAAC<br>TTCCTTAGAGGCTCAGCCGACCGTTAAATCCCCTCTTGATGG<br>GTACCCGGGGATCCCTTGAATAAGCCCTCACCCCTG<br>TTGACCTGAAGGCAGTTCCG<br>TAATGGACGTGGTGCTCTG                                                                                                                                                                                                                                                                      |
| pEXG2 oprF 187t      | JB-282a OprF 187t F<br>JB-283 OprF 187t R                                                                                                                            | PA14<br>PA14                                                                                       | ggaaattaataaggtaccgaattcgagctcgagccgggatccGAAAAGTTTTCAGATGCGA<br>AGCCGGGTTTTCTTAGAGGCTCAGCCGATTACGAACCACCGAAGTTGAAGCC                                                                                                                                                                                                                                                                                                                                                                             |
| pEXG2 oprF 314t      | JB-284a OprF 314t F<br>JB-285 OprF 314t R                                                                                                                            | PA14<br>PA14                                                                                       | ggaaattaataaggtaccgaattcgagctcgagccgggatccGAAACCGCAACAAAGAAAGG<br>CCTGAGCCGGGTTTTCTTAGAGGCTCAGCCGATTAGCCACCCTTCTACACCGTAC                                                                                                                                                                                                                                                                                                                                                                         |
| pJBOC                | oJBOC-001<br>oJBOC-002<br>oJBOC-003<br>oJBOC-004<br>oJBOC-005<br>oJBOC-006<br>JB-462 Stop pOprD<br>oJBOC-036<br>oJBOC-045<br>oJBOC-046<br>oJBOC-038<br>oJBOC-057     | pOPC<br>pOPC<br>pEXG2<br>pEXG2<br>pAD6<br>pAD6<br>PA14<br>PA14<br>pJBOC<br>pJBOC<br>pJBOC<br>pJBOC | cgccgttgatacacaagggttctgctcgcca<br>cccccaagtgtaagttccaacgagccattTCAGTGAAGCATCAAGACTAACAAATCGTATAATCC<br>ttgtctccgaagcagaacccttgggtatccaacggc<br>ATTGCAAACGCTAGGGCCTTGTGTCGAGGTCCAATACGCgctagctattacgogtaattcgaattg<br>gaatggctcggttgaaact<br>GCGTATTGGGACCTCGACACA<br>TTCTTAAATCTAGAGGATCctcatgcggaaccgagtgca<br>gagccattTCAGTGAAGCATCAAGACTAACAAATCctacgccccataagatcgccgt<br>tgaaagttccaacgagccattTCAGT<br>GCGCTACTGCCGCCAGGC<br>GAATTAGCTTGGCTGTTTTGGCGG<br>ATGTATATCTCCTTCTTAAATCTAGAGGATCctca |
| pPoprD-occD1         | JB-464 OccD1 Fw<br>JB-465 OccD1 Rv                                                                                                                                   | PA14<br>PA14                                                                                       | ccgcatgagGATCCTCTAGATTTAAGAAGGAGATATACATAATGAAAGTGATGAAGTGAGCGC<br>GAAAATCTTCTCTCATCCGCCAAAAACAGCCAAGCTAATTTACAGGATCGACAGCGGATAGTCG                                                                                                                                                                                                                                                                                                                                                               |
| pPoprD-occD2         | JB-176 OccD2 f<br>JB-177 OccD2 Rv                                                                                                                                    | PA14<br>PA14                                                                                       | tttccgagGATCCTCTAGATTTAAGAAGGAGATATACATatgaggaactgttgccttgagccg<br>GAAAATCTTCTCTCATCCGCCAAAAACAGCCAAGCTAATTTcagaacacgctgatggg                                                                                                                                                                                                                                                                                                                                                                     |
| pPoprD-occD3         | JB-178 OccD3 f<br>JB-179 OccD3 Rv                                                                                                                                    | PA14<br>PA14                                                                                       | tttccgagGATCCTCTAGATTTAAGAAGGAGATATACATcagggtgatgataccaacgagtgacc<br>GAAAATCTTCTCTCATCCGCCAAAAACAGCCAAGCTAATTTcgtttacagcaggtgaaggggaag                                                                                                                                                                                                                                                                                                                                                            |
| pPoprD-occD5         | JB-182 OccD5 f<br>JB-183 OccD5 Rv                                                                                                                                    | PA14<br>PA14                                                                                       | GAAAATCTTCTCTCATCCGCCAAAAACAGCCAAGCTAATTTcaccagatcgagccgggag<br>tttccgagGATCCTCTAGATTTAAGAAGGAGATATACATatgaaaaatctcagacgccc                                                                                                                                                                                                                                                                                                                                                                       |
| pPoprD-occD6         | JB-466 OccD6 fw<br>JB-467 OccD6 Rv                                                                                                                                   | PA14<br>PA14                                                                                       | GAAAATCTTCTCTCATCCGCCAAAAACAGCCAAGCTAATTTCTAGAACACGCTGAACGGGTACT<br>ccgcatgagGATCCTCTAGATTTAAGAAGGAGATATACATATGTTGAAGAAAAGGATTTGCTGCT                                                                                                                                                                                                                                                                                                                                                             |
| pPoprD-occK4         | JB-196 OccK4 f<br>JB-197 OccK4 Rv                                                                                                                                    | PA14<br>PA14                                                                                       | GAAAATCTTCTCTCATCCGCCAAAAACAGCCAAGCTAATTTcaccagagctttagcgttaattgacgatgaag<br>tttccgagGATCCTCTAGATTTAAGAAGGAGATATACATatgatcagggcagccccc                                                                                                                                                                                                                                                                                                                                                            |
| pPoprD-occK5         | JB-198 OccK5 f<br>JB-199 OccK5 Rv                                                                                                                                    | PA14<br>PA14                                                                                       | tttccgagGATCCTCTAGATTTAAGAAGGAGATATACATatgtcgacttccctgccc<br>GAAAATCTTCTCTCATCCGCCAAAAACAGCCAAGCTAATTTcaccagatcgccaggggtatagct                                                                                                                                                                                                                                                                                                                                                                    |
| pPoprD-occK6         | JB-478 OccK6 Fw<br>JB-479 OccK6 Rv                                                                                                                                   | PA14<br>PA14                                                                                       | ccgcatgagGATCCTCTAGATTTAAGAAGGAGATATACATATGAGCATGACCCCGATCG<br>GAAAATCTTCTCTCATCCGCCAAAAACAGCCAAGCTAATTTCTACCAGAGCGGCAGCGTGTA                                                                                                                                                                                                                                                                                                                                                                     |
| pPoprD-occK7         | JB-202 OccK7 f<br>JB-203 OccK7 Rv                                                                                                                                    | PA14<br>PA14                                                                                       | GAAAATCTTCTCTCATCCGCCAAAAACAGCCAAGCTAATTTcaccacagcggaacgc<br>tttccgagGATCCTCTAGATTTAAGAAGGAGATATACATatgaaaaatcttccgctcagatgc                                                                                                                                                                                                                                                                                                                                                                      |
| pPoprD-occK8         | JB-474 OccK8 Fw<br>JB-475 OccK8 Rv                                                                                                                                   | PA14<br>PA14                                                                                       | ccgcatgagGATCCTCTAGATTTAAGAAGGAGATATACATATGAAGAGTCGCAAGATCAACAAGTC<br>GAAAATCTTCTCTCATCCGCCAAAAACAGCCAAGCTAATTTCTACAGCAGCGGCAGGG                                                                                                                                                                                                                                                                                                                                                                  |
| pPoprD-oprG          | JB-470 OprG Fw<br>JB-471 OprG Rv                                                                                                                                     | PA14<br>PA14                                                                                       | ccgcatgagGATCCTCTAGATTTAAGAAGGAGATATACATATGCGTAAAGTCTGGCTTACC<br>GAAAATCTTCTCTCATCCGCCAAAAACAGCCAAGCTAATTTCTAGAACCTGTAGCCGAACCGA                                                                                                                                                                                                                                                                                                                                                                  |
| pPoprD-oprO          | JB-220 OprO f<br>JB-221 OprO Rv                                                                                                                                      | PA14<br>PA14                                                                                       | tttccgagGATCCTCTAGATTTAAGAAGGAGATATACATatgatccgtaagcactcgct<br>GAAAATCTTCTCTCATCCGCCAAAAACAGCCAAGCTAATTTctagaacacgctactgaaacggg                                                                                                                                                                                                                                                                                                                                                                   |
| pPoprD-tsx           | JB-468 Tsx Fw<br>JB-469 Tsx Rv                                                                                                                                       | PA14<br>PA14                                                                                       | ccgcatgagGATCCTCTAGATTTAAGAAGGAGATATACATATGAGCCGCACACTCCG<br>GAAAATCTTCTCTCATCCGCCAAAAACAGCCAAGCTAATTTCTAGAAGTGGTACTTGACCAGGAAG                                                                                                                                                                                                                                                                                                                                                                   |
| pPoprD-oprB          | JB-224 OprB f<br>JB-225 OprB Rv                                                                                                                                      | PA14<br>PA14                                                                                       | tttccgagGATCCTCTAGATTTAAGAAGGAGATATACATatgtacaagaacaagaaccagaccg<br>GAAAATCTTCTCTCATCCGCCAAAAACAGCCAAGCTAATTTcagaacacgctgtgatctgatcc                                                                                                                                                                                                                                                                                                                                                              |
| pPoprD-fadL          | JB-476 FadL Fw<br>JB-477 FadL Rv                                                                                                                                     | PA14<br>PA14                                                                                       | ccgcatgagGATCCTCTAGATTTAAGAAGGAGATATACATATGAAAACAATATGGTTAAAACCTCTCTCG<br>GAAAATCTTCTCTCATCCGCCAAAAACAGCCAAGCTAATTTCTAGAAGCGATAGGTGACCTGGG                                                                                                                                                                                                                                                                                                                                                        |

## SI References

1. Breidenstein EB, Khaira BK, Wiegand I, Overhage J, & Hancock RE (2008) Complex ciprofloxacin resistome revealed by screening a *Pseudomonas aeruginosa* mutant library for altered susceptibility. *Antimicrob Agents Chemother* 52(12):4486-4491.
